# Supplementary material for: Precision Immunotherapy Utilizing Adapter CAR-T Cells (AdCAR-T) in Metastatic Breast Cancer Leads to Target Specific Lysis
Source: MDPI journal article supplement (doi:10.3390/cancers16010168), 2023-12-29
Supplement: s1 [file s1]

# Precision Immunotherapy Utilizing Adapter CAR-T Cells (AdCAR-T) in Metastatic Breast Cancer Leads to Target Specific Lysis

Cansu E. Önder, Moustafa Moustafa-Oglou, Sarah M. Schröder, Andreas D. Hartkopf, André Koch, Christian M. Seitz

**Table S1.** List of BC patient data from whom the organoid lines were established. All patients were female aged between 52 and 70. Abbreviation: NST (no special type).

| MBC-PDO                          | #03                                                                                                | #04                                                      | #06                                                                                         | #07                                                                        |
|----------------------------------|----------------------------------------------------------------------------------------------------|----------------------------------------------------------|---------------------------------------------------------------------------------------------|----------------------------------------------------------------------------|
| <b>Primary tumor</b>             | NST (2008)                                                                                         | NST (2009)                                               | NST (2019)                                                                                  | NST (2019)                                                                 |
| <b>Therapy of primary tumor</b>  | Trastuzumab;<br>Aromasin;<br>Carboplatin; Taxol;<br>Avastin (until 2019)                           | FEC + Docetaxel;<br>Tamoxifen<br>(until 2013)            | Epirubicin/Cyclophosphamide<br>(aborted)                                                    | Doxorubicin                                                                |
| <b>Metastasis</b>                | Hepatic and pleural<br>metastasis (2019)                                                           | Lymph nodes (2017)<br>Hepatic metastasis<br>(2021)       | Hepatic and osseous<br>metastasis (2020)<br>Pulmonary and<br>medullary metastasis<br>(2021) | Cutaneous,<br>lymphogenic and<br>osseous metastasis<br>(2020-2021)         |
| <b>Therapy of Metastasis</b>     | Avastin                                                                                            | Ribociclib<br>+ Letrozole;<br>Palbociclib<br>+ Letrozole | Letrozole<br>+ Goserelin<br>+ Abemaciclib                                                   | Paclitaxel; Eribulin;<br>Abemaciclib<br>+ Letrozole                        |
| <b>Therapy prior to drainage</b> | Avastin;<br>Nab-Paclitaxel;<br>Eribulin (2020)                                                     | Abemaciclib<br>+ Fulvestrant<br>(2020-2021)              | Paclitaxel (2021)                                                                           | Capecitabine<br>(2021)                                                     |
| <b>Drainage</b>                  | Pleura (2021)                                                                                      | Pleura (2021)                                            | Pleura (2021)                                                                               | Pleura (2021)                                                              |
| <b>Follow-up therapy</b>         | Palbociclib<br>+ Letrozole;<br>Vinorelbine<br>+ Trastuzumab<br>+ Pertuzumab                        | Everolimus<br>+ Aromasin;<br>Doxorubicin                 | None, patient did not<br>survive                                                            | Carboplatin<br>+ Olaparib;<br>Olaparib                                     |
| <b>Additional information</b>    | Hepatic and pleural<br>metastasis (2019):<br>NST infiltration,<br><i>PIK3CA</i> H1047R<br>mutation | -                                                        | -                                                                                           | NST (2019):<br><i>BRCA1/2</i><br>deletion,<br><i>AKT1</i> E17K<br>mutation |

**Table S2.** Composition of Breast Cancer Medium (BCM). Composition was previously described [24, 27].

| Component                                                        | Final concentration | Company                                         | Catalog number                                      |
|------------------------------------------------------------------|---------------------|-------------------------------------------------|-----------------------------------------------------|
| L-WRN conditioned medium                                         | 50%                 | Home-made                                       | -                                                   |
| Neuregulin 1                                                     | 5 nM                | Peptotech (Cranbury, NJ, USA)                   | 100-03                                              |
| FGF7                                                             | 5 ng/mL             | Peptotech (Cranbury, NJ, USA)                   | 100-19                                              |
| FGF10                                                            | 20 ng/mL            | Peptotech (Cranbury, NJ, USA)                   | 100-26                                              |
| EGF                                                              | 5 ng/mL             | Peptotech (Cranbury, NJ, USA)                   | AF-100-15                                           |
| A83-01                                                           | 500 nM              | Tocris Bioscience (Bristol, UK)                 | 2939                                                |
| Y-27632                                                          | 5 $\mu$ M           | Hölzel Diagnostika Handels GmbH (Köln, Germany) | TMO-T1725-50 mg                                     |
| SB202190                                                         | 500 nM              | Sigma-Aldrich (St. Louis, MO, USA)              | S7067                                               |
| B-27™ supplement                                                 | 1x                  | Thermo Fisher Scientific (Waltham, MA, USA)     | 17504-44                                            |
| Nicotinamide (NIC)                                               | 5 mM                | Sigma-Aldrich (St. Louis, MO, USA)              | NO636                                               |
| N-Acetylcysteine (NAC)                                           | 1.25 mM             | Sigma-Aldrich (St. Louis, MO, USA)              | A9165-5G                                            |
| Primocin                                                         | 50 $\mu$ g/mL       | InvivoGen (San Diego, CA, USA)                  | Ant-pm-1                                            |
| AdvDMEM +++<br>(1% Pen/Strep,<br>1x GlutaMAX™-I,<br>10 mM HEPES) | 1x                  | Thermo Fisher Scientific (Waltham, MA, USA)     | 12634-028;<br>15140-122;<br>35050-038;<br>15630-056 |

**Table S3.** Antibody information chart.

| Antibody    | Clone                    | Host                            | Isotype                   | Conjugation | Company                                           | Cat No.     |
|-------------|--------------------------|---------------------------------|---------------------------|-------------|---------------------------------------------------|-------------|
| Anti-CD47   | REA220                   | human<br>Hybridoma cell<br>line | recombinant<br>human IgG1 | Biotin      | Miltenyi Biotec                                   | 130-101-342 |
| anti-CD66   | TET2                     | human<br>Hybridoma cell<br>line | recombinant<br>human IgG1 | Biotin      | Miltenyi Biotec                                   | 130-093-156 |
| anti-CD112  | R2.525                   | human<br>Hybridoma cell<br>line | recombinant<br>human IgG1 | Biotin      | Miltenyi Biotec                                   | 130-109-000 |
| anti-CD133  | REA820                   | human<br>Hybridoma cell<br>line | recombinant<br>human IgG1 | Biotin      | Miltenyi Biotec                                   | 130-112-193 |
| anti-CD146  | 541-10B2                 | human<br>Hybridoma cell<br>line | recombinant<br>human IgG1 | Biotin      | Miltenyi Biotec                                   | 130-092-850 |
| anti-CD171  | REA163                   | human<br>Hybridoma cell<br>line | recombinant<br>human IgG1 | Biotin      | Miltenyi Biotec                                   | 130-100-702 |
| anti-CD276  | REA1094                  | human<br>Hybridoma cell<br>line | recombinant<br>human IgG1 | Biotin      | Miltenyi Biotec                                   | 130-118-579 |
| anti-ROR1   | REA1051                  | human<br>Hybridoma cell<br>line | recombinant<br>human IgG1 | Biotin      | Miltenyi Biotec                                   | 130-118-018 |
| anti-CD326  | REA764                   | human<br>Hybridoma cell<br>line | recombinant<br>human IgG1 | Biotin      | Miltenyi Biotec                                   | 130-111-114 |
| anti-SSEA   | REA101                   | human<br>Hybridoma cell<br>line | recombinant<br>human IgG1 | Biotin      | Miltenyi Biotec                                   | 130-098-339 |
| anti-TROP2  | REA916                   | human<br>Hybridoma cell<br>line | recombinant<br>human IgG1 | Biotin      | Miltenyi Biotec                                   | 130-115-096 |
| anti-Biotin | REA746                   | human<br>Hybridoma cell<br>line | recombinant<br>human IgG1 | APC         | Miltenyi Biotec                                   | 130-111-069 |
| anti-HER2   | Trastuzumab,<br>Kanjinti | Chinese Hamster<br>Ovarian      | IgG1 Isotype              | Biotin      | Pharmacy<br>University<br>clinics<br>Tübingen UKT | 1144554A    |
| anti-EGFR   | Cetixumab,<br>Erbixux    | murine myeloma<br>cell line     | IgG1 Isotype              | Biotin      | Pharmacy<br>University<br>clinics<br>Tübingen UKT | G0157D      |

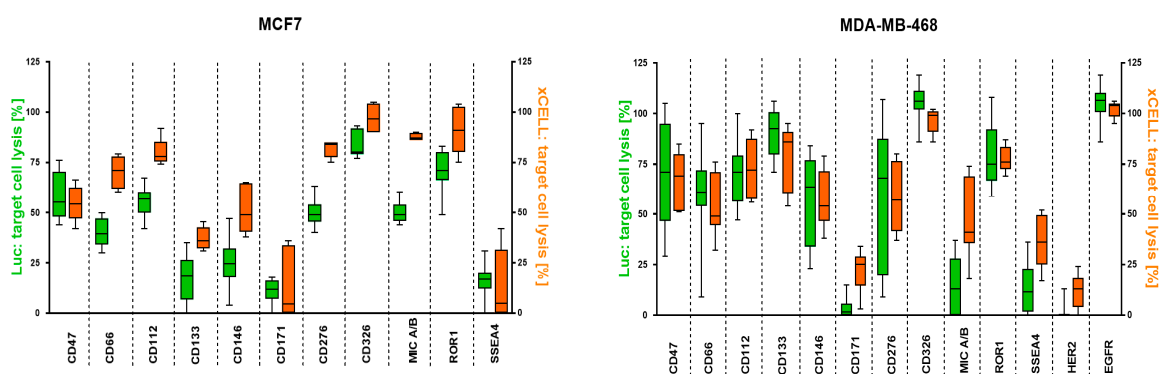

**Figure S1.** Correlation between LCA and real-time ICA. Comparison of target cell lysis of MCF-7 and MB-MDA-468 via LCA (green bars) or ICA (red bars). Target cell lysis with an E:T ratio of 2:1 via LCA and ICA was determined after 48h and 24h respectively. Data is represented by mean values ( $n=6$ )  $\pm$  SD.

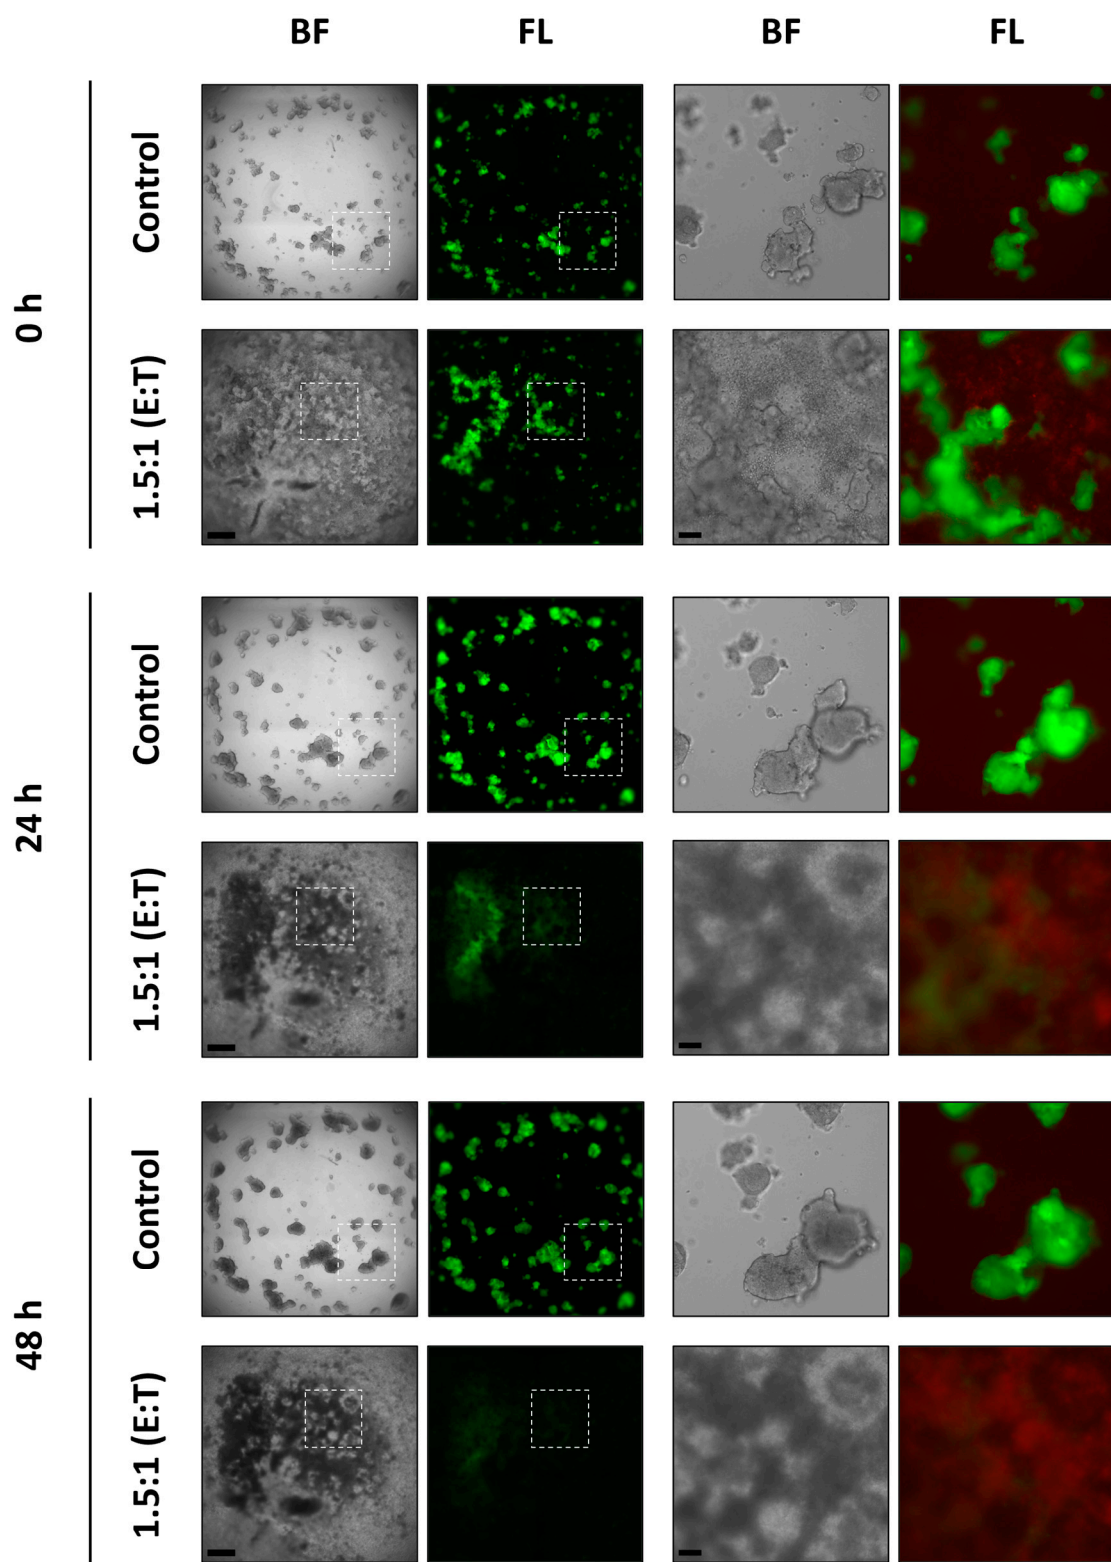

**Figure S2.** Direct CD276 CAR-T cell treatment of MCF-7 organoids expressing GFP. Brightfield (BF) and fluorescence (FL) images of GFP-expressing MCF-7 organoids (green) treated with mCherry-expressing CD276 CAR-T cells (red) in an E:T ratio of 1.5:1 for 48 h. Control conditions represent MCF-7 organoids alone. Scale bar of left two columns: 500  $\mu$ m. Scale bar of right two columns: 100  $\mu$ m.

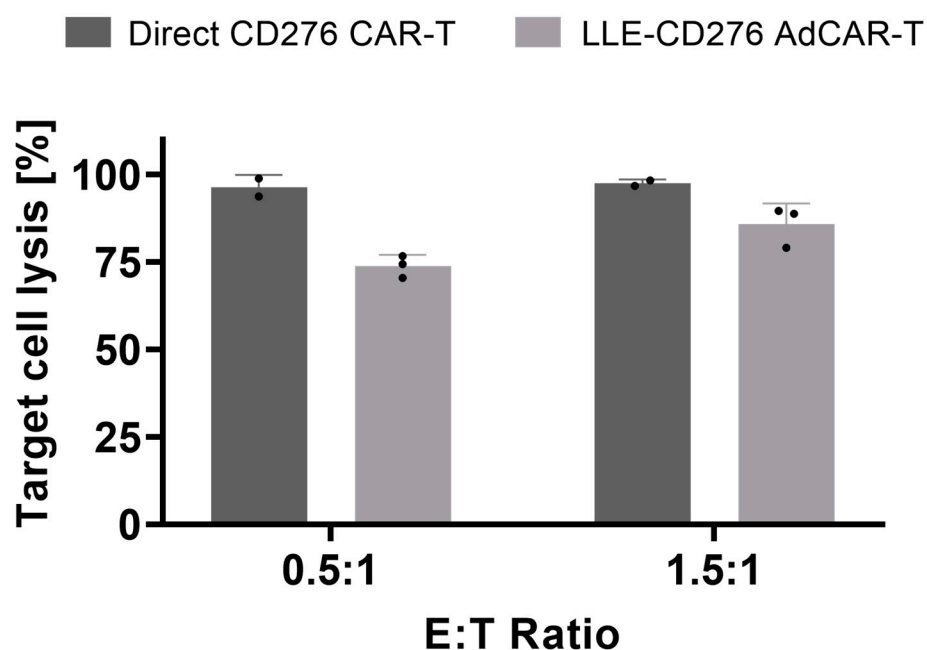

**Figure S3.** Comparison of target cell lysis between direct CD276 CAR-T and LLE-CD276 AdCAR-T on MCF-7 organoids at an E:T ratio of 0.5:1 and 1.5:1 after 48h. Target cell lysis was normalized to MCF-7 organoids alone. Data shown represents the mean  $\pm$  SD of biological duplicates ( $n = 2$ ) and triplicates ( $n = 3$ ) for direct CD276 CAR-T and LLE-CD276 AdCAR-T respectively.

**Disclaimer/Publisher's Note:** The statements, opinions and data contained in all publications are solely those of the individual author(s) and contributor(s) and not of MDPI and/or the editor(s). MDPI and/or the editor(s) disclaim responsibility for any injury to people or property resulting from any ideas, methods, instructions or products referred to in the content.
